# Supplementary material for: Long noncoding RNA HULC promotes hepatocellular carcinoma progression
Source: publisher site journal article supplement (doi:10.18632/aging.102378), 2019-10-23
Supplement: Supplementary file [file aging-v11i20-102378-supplementary-material-SD1.pdf]

SUPPLEMENTARY FIGURES

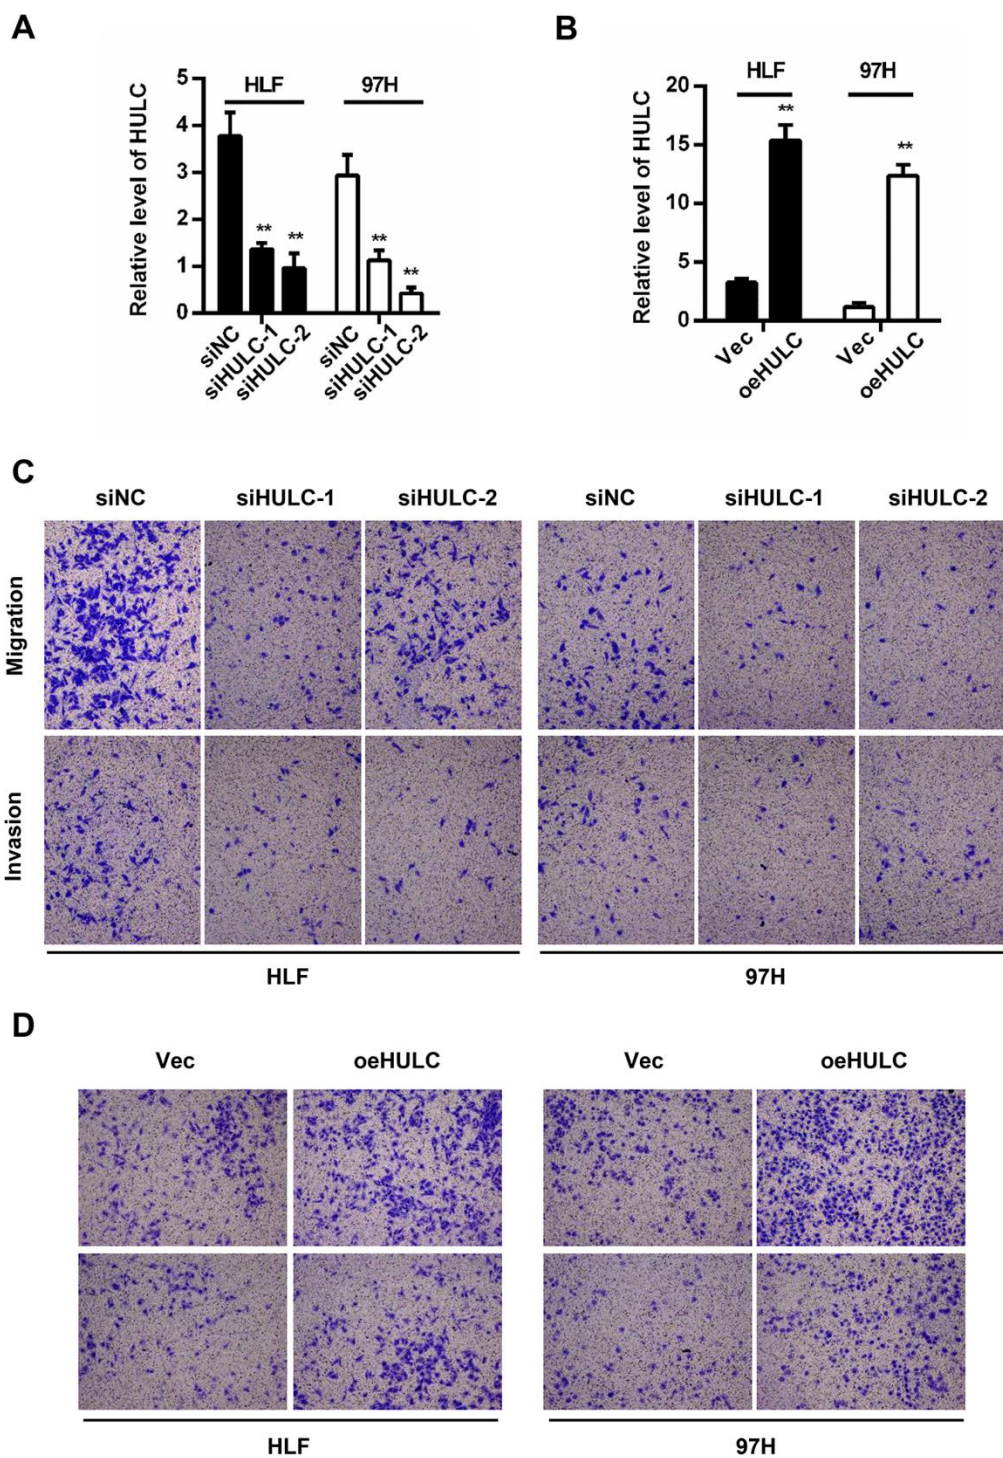

**Supplementary Figure 1. HULC promotes HCC cells migration, and invasion.** Quantitative PCR showing that HULC levels were (A) downregulated after siHULC transfection and (B) upregulated after pcDNA-HULC transfection. (C, D) Representative images of transwell assay. \*\*P < 0.01.

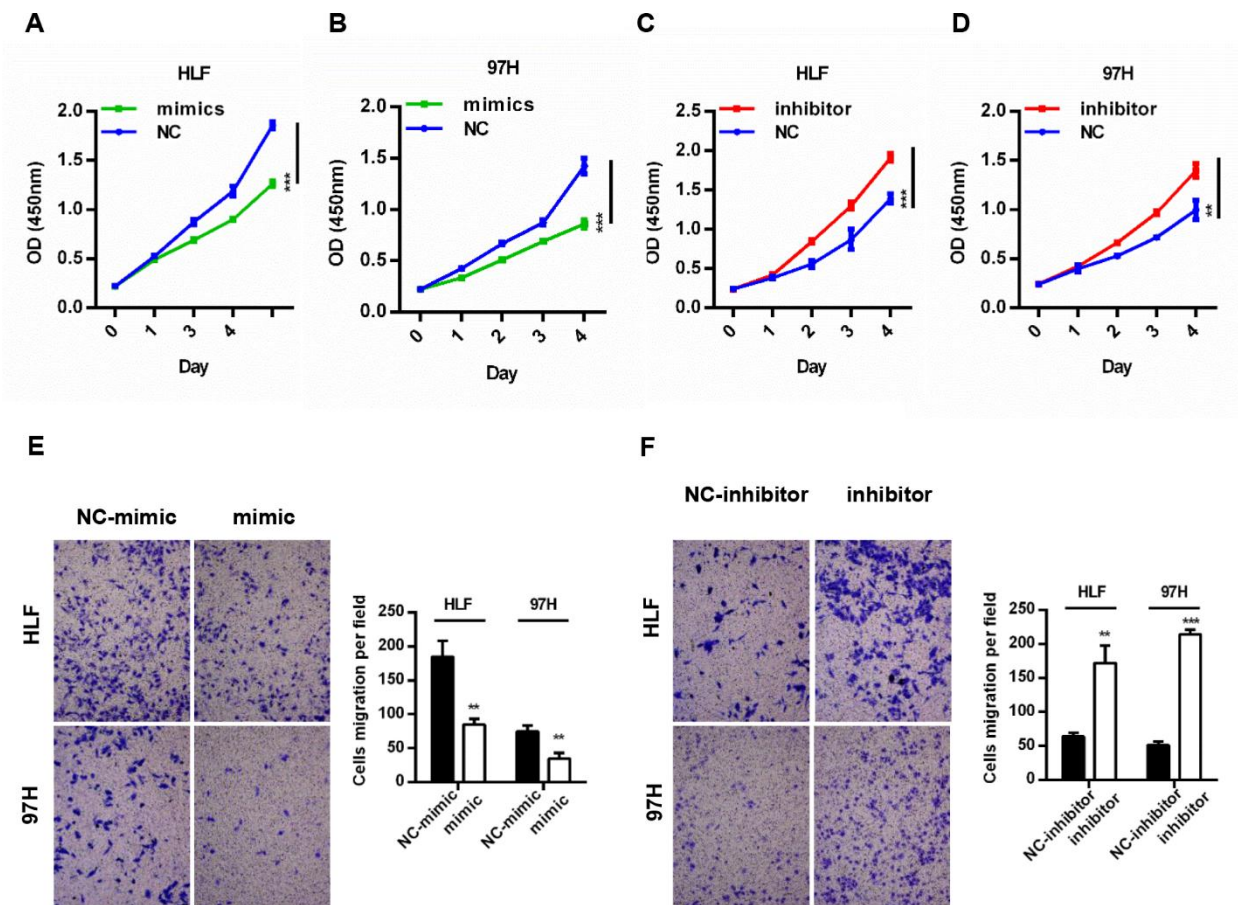

**Supplementary Figure 2. miR-2052 inhibits HCC cells proliferation and migration.** (A–D) Viability of HCC cells transfected with miR-2052 mimic or inhibitor measured by CCK8 assays. (E–F) Transwell assay showing that miR-2052 suppressed HCC cell migration. \*\*P < 0.01, \*\*\*P < 0.001.

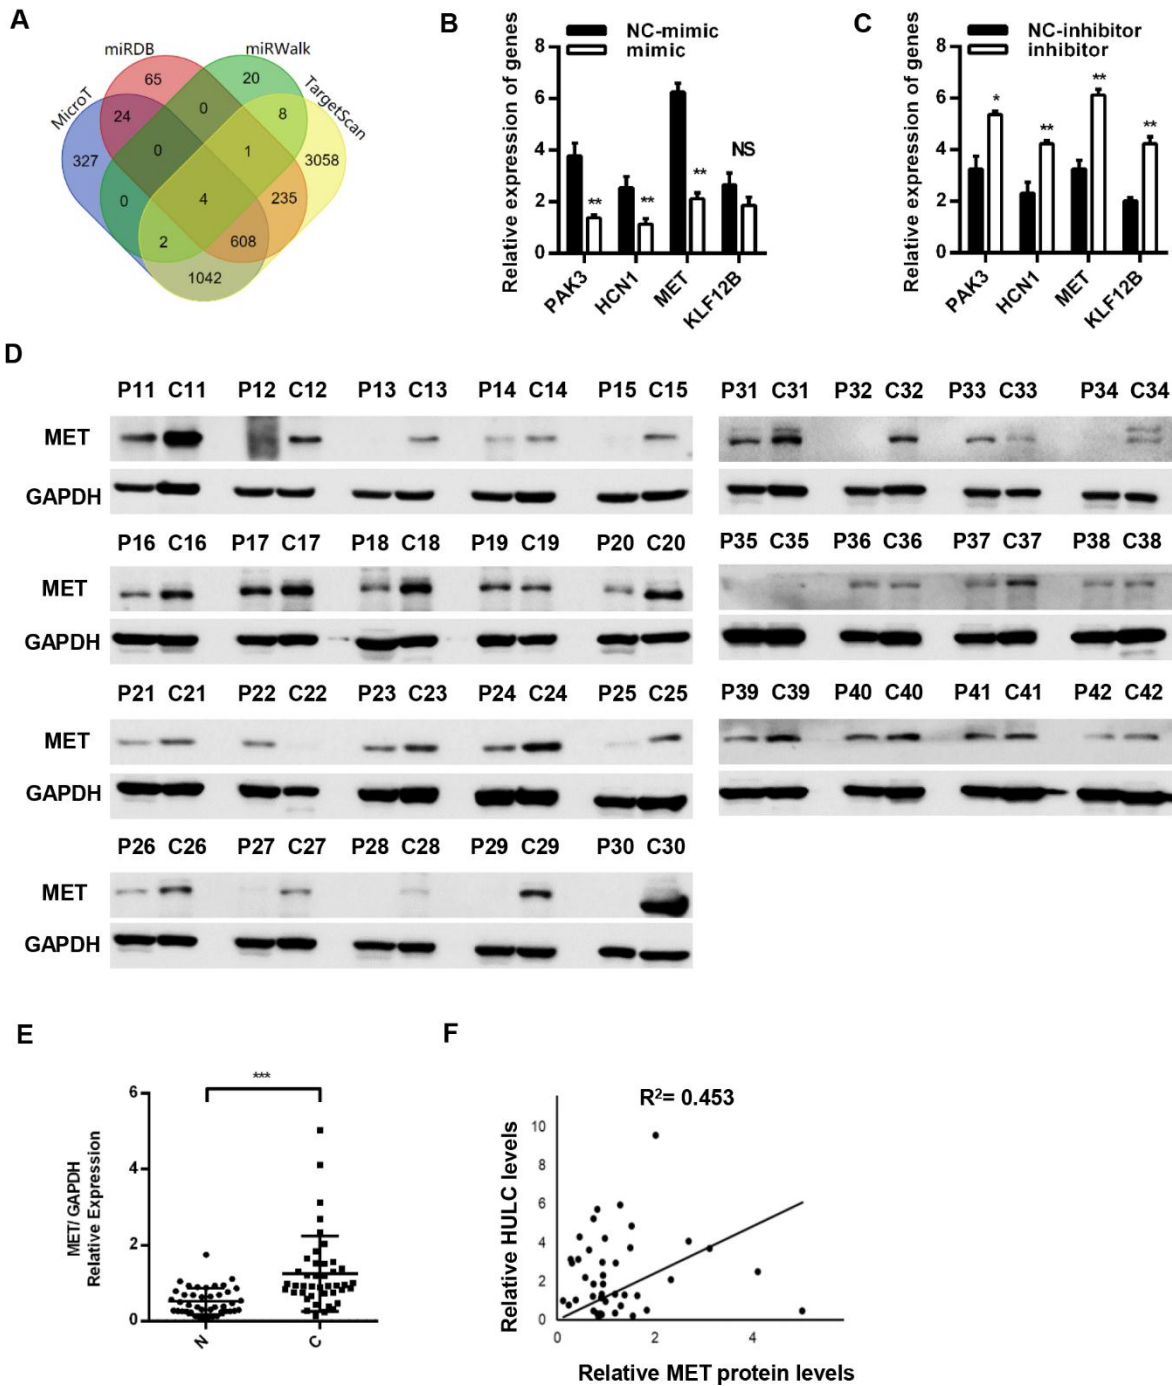

**Supplementary Figure 3. MET is a direct target of miR-2052.** (A) Venn diagrams showing the number of potential mRNAs targeted by miR-2052. (B, C) qPCR analysis of the expression of four candidate mRNAs when treated with miR-2052 mimic or inhibitor. (D) MET protein levels in HCC tissues, and (E) statistical analysis of relative MET levels in HCC tissues compared to normal tissue controls (n=42). (F) Correlation between HULC and MET expression in paired HCC tissues (n=42). \* $P < 0.05$ , \*\* $P < 0.01$ , \*\*\* $P < 0.001$ .

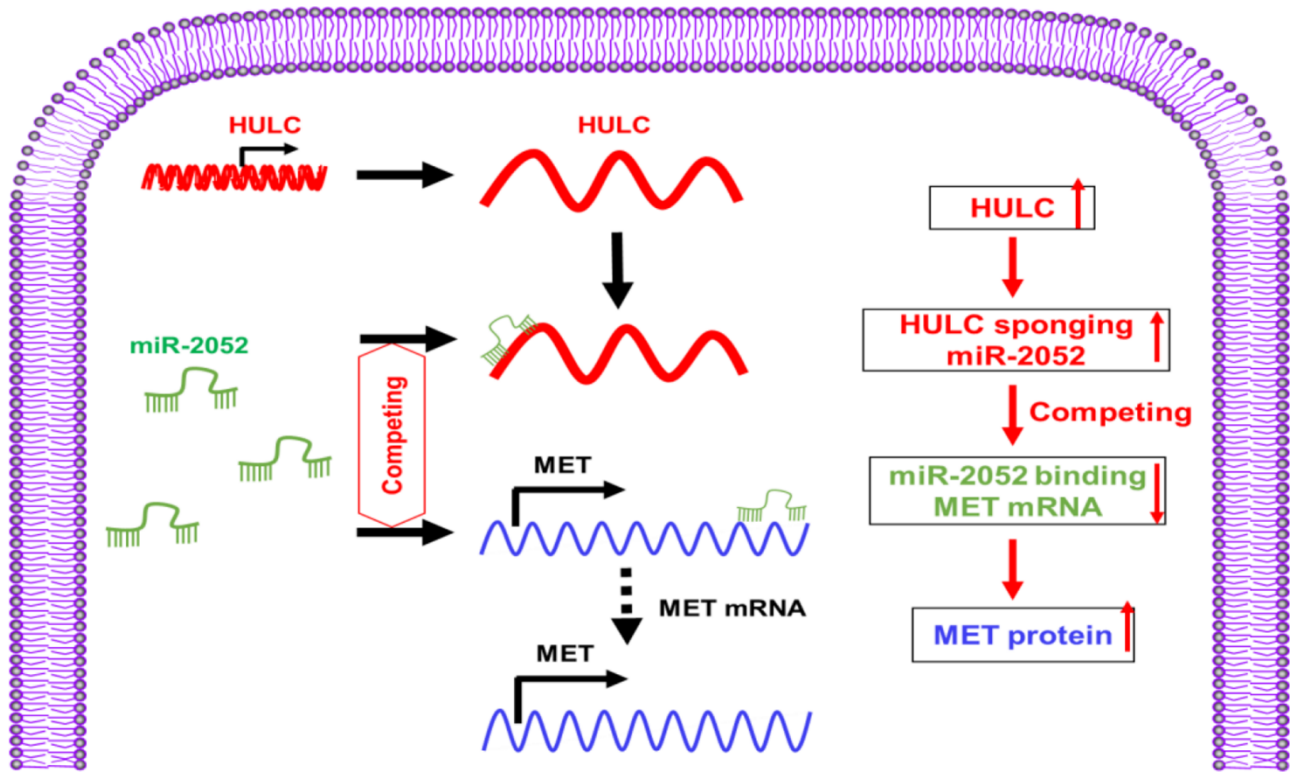

**Supplementary Figure 4. A schematic figure of the HULC/miR-2052/MET axis.** (A) A schematic figure demonstrates the regulatory mechanism of the HULC/miR-2052/MET axis.
